# Supplementary material for: La3B6O13(OH): The First Acentric High‐Pressure Borate Displaying Edge‐Sharing BO4 Tetrahedra
Source: PubMed Central journal article supplement — Chemistry. 2020 May 20;26(30):6851–61. doi: 10.1002/chem.201905419 (PMC7317773; doi:10.1002/chem.201905419), 2020-05-20
Supplement: CHEM-26-6851-s001.pdf [file CHEM-26-6851-s001.pdf]

# Chemistry–A European Journal

Supporting Information

## **La<sub>3</sub>B<sub>6</sub>O<sub>13</sub>(OH): The First Acentric High-Pressure Borate Displaying Edge-Sharing BO<sub>4</sub> Tetrahedra**

Birgit Fuchs,<sup>[a]</sup> Gunter Heymann,<sup>[a]</sup> Xuefei Wang,<sup>[b]</sup> Abudukadi Tudi,<sup>[b]</sup>  
Lkhamsuren Bayarjargal,<sup>[c]</sup> Renée Siegel,<sup>[d]</sup> Adrian Schmutzler,<sup>[d]</sup> Jürgen Senker,<sup>[d]</sup>  
Bastian Joachim-Mrosko,<sup>[e]</sup> Andreas Saxer,<sup>[f]</sup> Zihua Yang,<sup>[b]</sup> Shilie Pan,<sup>[b]</sup> and  
Hubert Huppertz<sup>\*[a]</sup>

# Supporting Information

## **La<sub>3</sub>B<sub>6</sub>O<sub>13</sub>(OH): The First Acentric High-Pressure Borate**

### **Displaying Edge-Sharing BO<sub>4</sub> Tetrahedra**

Birgit Fuchs,<sup>[a]</sup> Gunter Heymann,<sup>[a]</sup> Xuefei Wang,<sup>[b]</sup> Abudukadi Tudi,<sup>[b]</sup> Lkhamsuren Bayarjargal,<sup>[c]</sup> Renée Siegel,<sup>[d]</sup> Adrian Schmutzler,<sup>[d]</sup> Jürgen Senker,<sup>[d]</sup> Bastian Joachim-Mrosko,<sup>[e]</sup> Andreas Saxer,<sup>[f]</sup> Zhihua Yang,<sup>[b]</sup> Shilie Pan,<sup>[b]</sup> and Hubert Huppertz\*<sup>[a]</sup>

**Table S1.** Wyckoff positions, atomic coordinates, and equivalent isotropic displacement parameters  $U_{\text{eq}}/\text{\AA}^2$  (standard deviations in parentheses). All atoms are located at the Wyckoff position  $2a$ .

| Atom | $x$        | $y$        | $z$        | $U_{\text{eq}}$ |
|------|------------|------------|------------|-----------------|
| La1  | 0.4415(6)  | 0.3298(2)  | 0.7242(3)  | 0.0031(5)       |
| La2  | 0.5239(2)  | 0.5025(4)  | 0.2729(2)  | 0.0032(3)       |
| La3  | 0.5520(9)  | 0.1737(2)  | 0.2748(3)  | 0.0037(6)       |
| B1   | 0.0553(5)  | 0.3583(2)  | 0.4066(3)  | 0.0035(3)       |
| B2   | 0.0646(5)  | 0.6905(2)  | 0.4109(3)  | 0.0036(3)       |
| B3   | 0.0202(8)  | 0.6832(3)  | 0.0758(6)  | 0.0031(6)       |
| B4   | 0.0643(5)  | 0.0247(2)  | 0.4072(3)  | 0.0036(3)       |
| B5   | 0.9405(3)  | 0.0013(4)  | 0.00627(2) | 0.0034(2)       |
| B6   | 0.0234(8)  | 0.3188(3)  | 0.00729(6) | 0.0050(6)       |
| O1   | 0.3534(5)  | 0.3366(3)  | 0.3899(4)  | 0.0043(4)       |
| O2   | 0.0270(3)  | 0.4745(2)  | 0.4245(2)  | 0.0035(2)       |
| O3   | 0.8878(5)  | 0.3300(3)  | 0.2454(3)  | 0.0035(4)       |
| O4   | 0.0544(3)  | 0.8066(2)  | 0.4325(2)  | 0.0036(2)       |
| O5   | 0.1906(5)  | 0.7808(2)  | 0.0604(4)  | 0.0044(4)       |
| O6   | 0.1980(6)  | 0.2221(2)  | 0.0538(4)  | 0.0056(4)       |
| O7   | 0.1075(6)  | 0.1647(3)  | 0.7508(4)  | 0.0038(4)       |
| O8   | 0.1928(5)  | 0.5952(2)  | 0.0154(4)  | 0.0053(4)       |
| O9   | 0.3561(3)  | 0.0000(3)  | 0.3717(2)  | 0.0047(2)       |
| O10  | 0.1232(3)  | 0.4957(3)  | 0.7450(2)  | 0.0037(3)       |
| O11  | 0.3591(5)  | 0.6647(3)  | 0.3913(4)  | 0.0041(4)       |
| O12  | 0.2440(2)  | 0.0027(3)  | 0.0306(2)  | 0.0062(2)       |
| O13  | 0.1929(5)  | 0.4094(2)  | 0.0231(4)  | 0.0042(4)       |
| O14  | 0.0508(3)  | 0.1406(2)  | 0.4280(2)  | 0.0036(2)       |
| H1   | 0.3070(60) | 0.0080(60) | 0.1340(40) | 0.015(8)        |

**Table S2.** Anisotropic displacement parameters  $U_{ij}$  for  $\text{La}_3\text{B}_6\text{O}_{13}(\text{OH})$  (standard deviations in parentheses).

| Atom | $U_{11}$   | $U_{22}$   | $U_{33}$   | $U_{23}$    | $U_{13}$    | $U_{12}$   |
|------|------------|------------|------------|-------------|-------------|------------|
| La1  | 0.00357(9) | 0.00232(2) | 0.00327(8) | -0.00009(5) | -0.00020(6) | 0.00010(7) |
| La2  | 0.00348(4) | 0.00287(4) | 0.00315(4) | 0.00004(8)  | 0.00040(2)  | 0.00060(2) |
| La3  | 0.00334(8) | 0.00469(2) | 0.00326(8) | 0.00019(5)  | -0.00013(6) | 0.00074(6) |
| B1   | 0.0039(7)  | 0.0036(8)  | 0.0031(7)  | 0.0004(6)   | 0.0001(6)   | 0.0000(6)  |
| B2   | 0.0044(7)  | 0.0021(8)  | 0.0042(8)  | 0.0002(6)   | -0.0004(6)  | 0.0002(6)  |
| B3   | 0.0050(2)  | 0.0038(2)  | 0.0006(2)  | 0.0008(1)   | 0.0006(2)   | 0.0024(1)  |
| B4   | 0.0036(7)  | 0.0030(7)  | 0.0041(7)  | -0.0007(5)  | 0.0000(6)   | 0.0003(5)  |
| B5   | 0.0044(5)  | 0.0035(5)  | 0.0024(5)  | 0.0018(2)   | 0.0009(4)   | 0.0005(2)  |
| B6   | 0.0036(2)  | 0.0049(2)  | 0.0066(2)  | 0.0004(2)   | -0.0007(2)  | 0.0018(1)  |
| O1   | 0.0034(8)  | 0.0044(1)  | 0.0050(1)  | -0.0005(9)  | 0.0002(7)   | 0.0005(8)  |
| O2   | 0.0050(5)  | 0.0026(4)  | 0.0030(5)  | 0.0002(4)   | 0.0003(4)   | 0.0004(4)  |
| O3   | 0.0036(7)  | 0.0050(8)  | 0.0019(8)  | 0.0004(7)   | 0.0001(6)   | 0.0013(7)  |
| O4   | 0.0052(5)  | 0.0025(5)  | 0.0030(5)  | -0.0006(4)  | 0.0013(4)   | 0.0006(4)  |
| O5   | 0.0051(8)  | 0.0029(1)  | 0.0052(1)  | -0.0007(7)  | -0.0015(7)  | 0.0013(7)  |
| O6   | 0.0045(8)  | 0.0070(2)  | 0.0054(1)  | -0.0021(8)  | -0.0020(7)  | 0.0012(7)  |
| O7   | 0.0037(8)  | 0.0049(8)  | 0.0028(9)  | -0.0004(7)  | 0.0000(7)   | 0.0005(6)  |
| O8   | 0.0050(8)  | 0.0052(2)  | 0.0056(1)  | 0.0026(8)   | -0.0005(7)  | -0.0005(7) |
| O9   | 0.0030(4)  | 0.0044(5)  | 0.0067(4)  | -0.0001(2)  | 0.0007(3)   | 0.0001(1)  |
| O10  | 0.0036(4)  | 0.0051(9)  | 0.0026(4)  | 0.0001(7)   | 0.0002(3)   | -0.0021(6) |
| O11  | 0.0026(9)  | 0.0035(9)  | 0.0062(2)  | -0.0002(9)  | -0.0002(8)  | 0.0005(8)  |
| O12  | 0.0043(4)  | 0.0088(4)  | 0.0055(4)  | 0.0000(2)   | 0.0010(3)   | 0.0002(2)  |
| O13  | 0.0045(8)  | 0.0030(1)  | 0.0051(1)  | -0.0010(8)  | 0.0009(7)   | -0.0001(7) |
| O14  | 0.0048(5)  | 0.0031(5)  | 0.0029(5)  | -0.0004(4)  | 0.0013(4)   | 0.0006(4)  |

**Table S3.** Interatomic La–O distances /Å for La<sub>3</sub>B<sub>6</sub>O<sub>13</sub>(OH) (standard deviations in parentheses).

|          |      |              |          |      |              |          |      |              |
|----------|------|--------------|----------|------|--------------|----------|------|--------------|
| La1      | –O5  | 2.455(3)     | La2      | –O11 | 2.401(3)     | La3      | –O6  | 2.434(3)     |
|          | –O11 | 2.486(3)     |          | –O1  | 2.449(3)     |          | –O1  | 2.459(3)     |
|          | –O9  | 2.502(4)     |          | –O12 | 2.521(2)     |          | –O11 | 2.518(3)     |
|          | –O1  | 2.519(3)     |          | –O2  | 2.662(2)     |          | –O9  | 2.532(4)     |
|          | –O10 | 2.629(3)     |          | –O2  | 2.676(2)     |          | –O3  | 2.587(3)     |
|          | –O4  | 2.654(2)     |          | –O9  | 2.690(2)     |          | –O14 | 2.672(2)     |
|          | –O7  | 2.668(3)     |          | –O13 | 2.713(3)     |          | –O8  | 2.683(3)     |
|          | –O4  | 2.702(2)     |          | –O7  | 2.740(3)     |          | –O14 | 2.695(2)     |
|          | –O13 | 2.727(3)     |          | –O8  | 2.750(3)     |          | –O10 | 2.774(3)     |
|          |      |              |          | –O3  | 2.831(3)     |          |      |              |
| <b>Ø</b> |      | <b>2.594</b> | <b>Ø</b> |      | <b>2.643</b> | <b>Ø</b> |      | <b>2.595</b> |

**Table S4.** Charge distributions according to both the bond-length/bond-strength ( $\Sigma V$ ) and the CHARDI ( $\Sigma Q$ ) concept.

|            |       |             |             |       |       |       |       |       |       |       |
|------------|-------|-------------|-------------|-------|-------|-------|-------|-------|-------|-------|
|            | La1   | La2         | La3         | B1    | B2    | B3    | B4    | B5    | B6    | H1    |
| $\Sigma V$ | 2.98  | 2.99        | 3.00        | 2.99  | 2.98  | 2.97  | 2.97  | 3.00  | 2.97  | 1.05  |
| $\Sigma Q$ | 3.03  | 2.95        | 2.99        | 2.93  | 2.98  | 3.13  | 3.02  | 2.99  | 3.02  | 0.98  |
|            | O1    | O2          | O3          | O4    | O5    | O6    | O7    | O8    | O9    | O10   |
| $\Sigma V$ | -2.11 | -1.96       | -2.05       | -1.97 | -1.87 | -2.00 | -2.00 | -1.75 | -1.82 | -1.99 |
| $\Sigma Q$ | -2.02 | -2.00       | -2.20       | -1.99 | -1.88 | -1.83 | -1.93 | -2.02 | -1.99 | -1.98 |
|            | O11   | O12<br>(-H) | O12<br>(+H) | O13   | O14   |       |       |       |       |       |
| $\Sigma V$ | -2.15 | -1.14       | -1.87       | -1.95 | -1.73 |       |       |       |       |       |
| $\Sigma Q$ | -2.14 | -1.18       | -2.06       | -1.97 | -1.98 |       |       |       |       |       |

**Table S5.** <sup>11</sup>B NMR chemical shift and quadrupolar interactions derived from quantum mechanical calculations.

|    |                             |                              |                    |                     |                   |
|----|-----------------------------|------------------------------|--------------------|---------------------|-------------------|
|    | $\delta_{\text{iso}}$ /ppm* | $\delta_{\text{aniso}}$ /ppm | $\eta_{\text{CS}}$ | $C_{\text{Q}}$ /kHz | $\eta_{\text{Q}}$ |
| B1 | 91.7                        | 2.3                          | 0.32               | 330                 | 0.89              |
| B2 | 91.2                        | -3.3                         | 0.20               | 363                 | 0.76              |
| B3 | 91.6                        | 12.6                         | 0.51               | 503                 | 0.70              |
| B4 | 91.4                        | 4.0                          | 0.51               | 388                 | 0.47              |
| B5 | 91.2                        | -4.2                         | 0.76               | 179                 | 0.69              |
| B6 | 91.7                        | 12.7                         | 0.48               | 484                 | 0.80              |

\* absolute value: not referenced

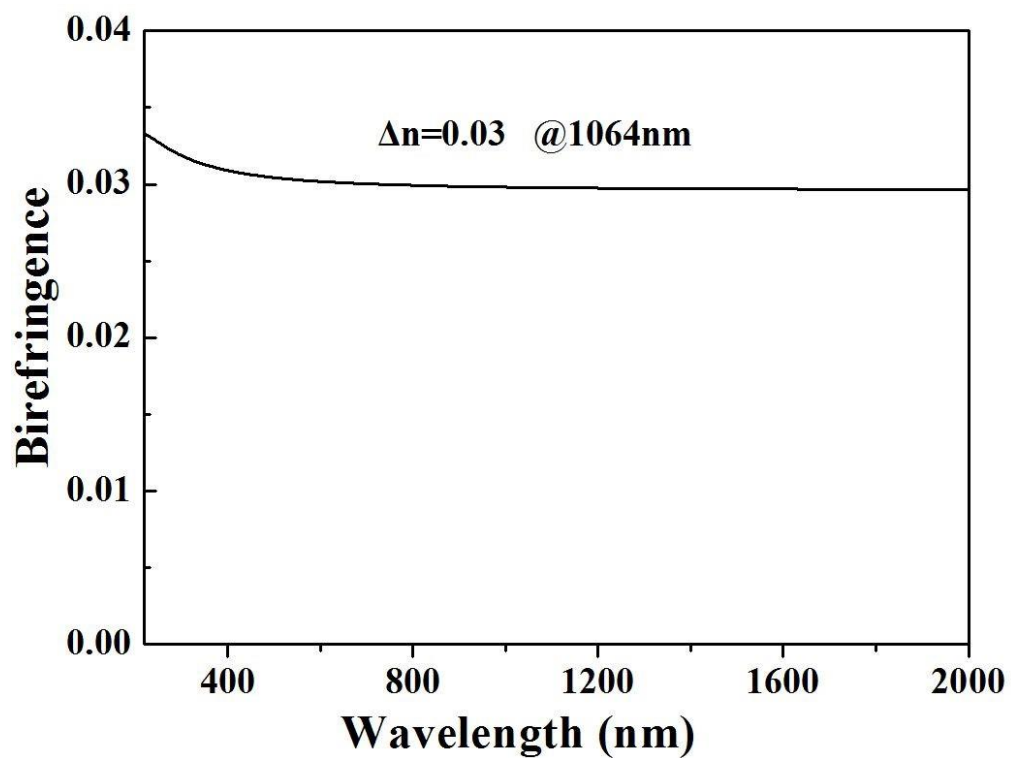

**Figure S1.** Calculated birefringence of  $\text{La}_3\text{B}_6\text{O}_{13}(\text{OH})$ .

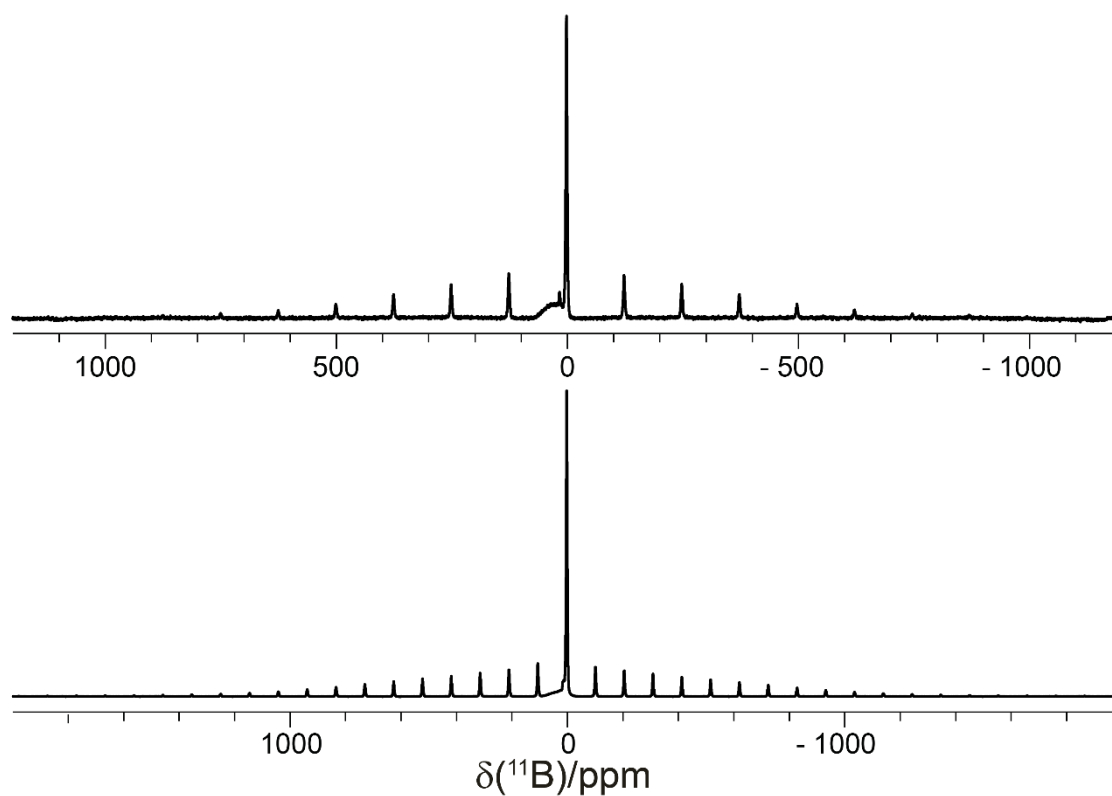

**Figure S2.**  $^{11}\text{B}$  MAS NMR spectra acquired at  $B_0$  field of 23.4 T with a spinning speed of 40 kHz (top) and 14.1 T with a spinning speed of 20 kHz (bottom).

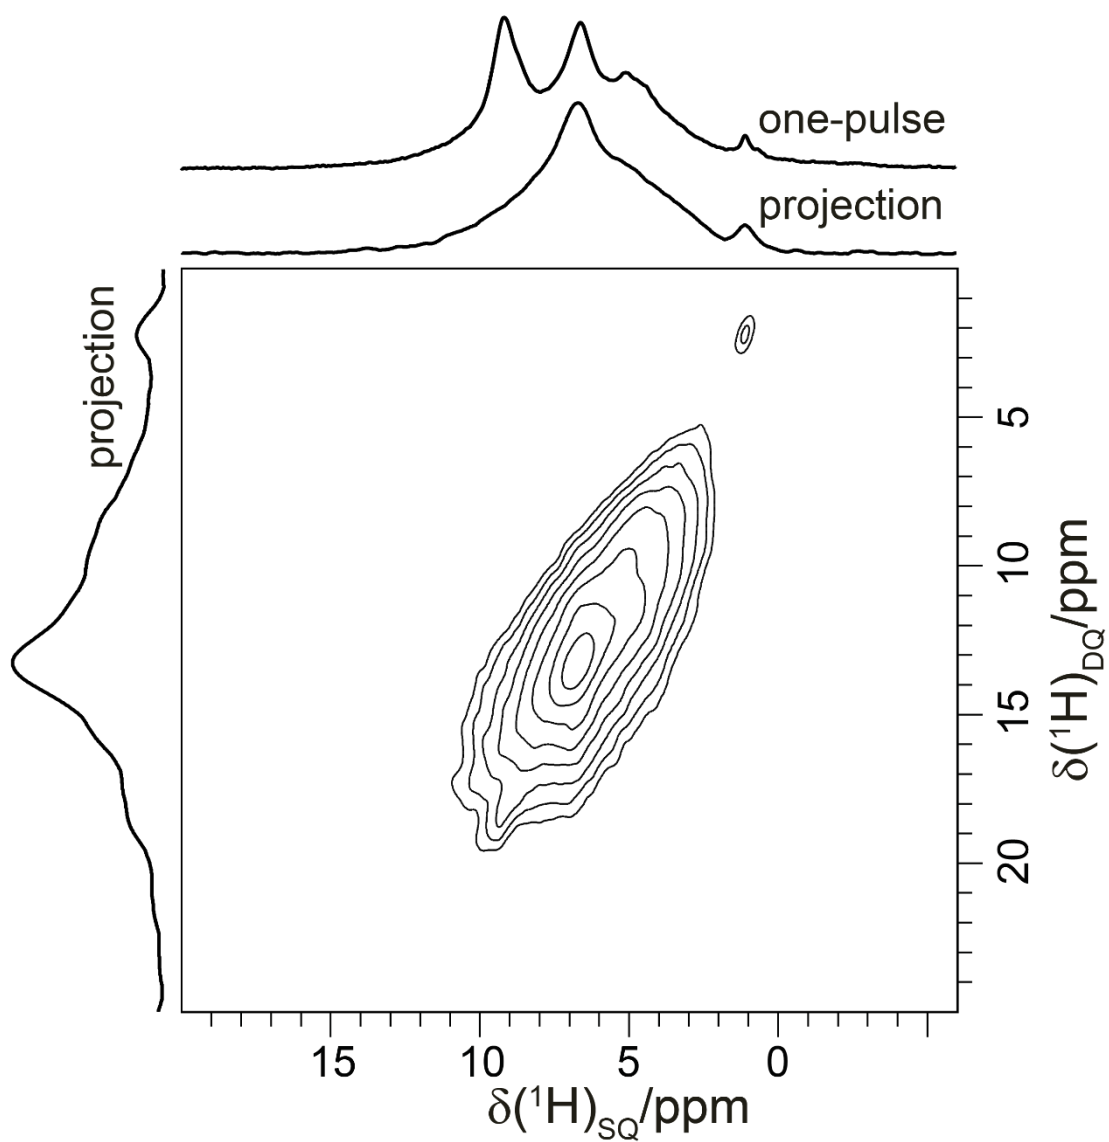

**Figure S3.**  $^1\text{H}$ - $^1\text{H}$  DQ-SQ NMR spectrum acquired at  $B_0$  field 14.1 T, with a spinning speed of 62.5 kHz using the  $\text{R12}_2^5$  sequence with a DQ excitation and recoupling of 64.0  $\mu\text{s}$ .
